---

1 **Construction of synthetic microbiota for reproducible flavor metabolism in**  
2 **Chinese light aroma type liquor produced by solid-state fermentation**

3

4 Shilei Wang<sup>a, b</sup>, Qun Wu<sup>a, b, \*</sup>, Yao Nie<sup>a</sup>, Yan Xu<sup>a, \*</sup>

5 <sup>a</sup> State Key Laboratory of Food Science and Technology, Synergetic Innovation Center of  
6 Food Safety and Nutrition, School of Biotechnology, Jiangnan University, Wuxi, Jiangsu,  
7 214122, China.

8 <sup>b</sup> Suqian Industrial Technology Research Institute of Jiangnan University, Suqian, Jiangsu,  
9 223800, China.

10

11

12 **\*Corresponding author:**

13 State Key Laboratory of Food Science and Technology, Synergetic Innovation Center of Food  
14 Safety and Nutrition, School of Biotechnology, Jiangnan University, Wuxi, Jiangsu, 214122,  
15 China.

16 Phone: +86-510-85864112

17 Fax: +86-510-85864112

18 E-mail: wuq@jiangnan.edu.cn (Q. Wu), yxu@jiangnan.edu.cn (Y. Xu).

19

20 **Running headline:** Synthetic microbiota in food fermentation

---

21 **ABSTRACT**

22 Natural microbiota plays an essential role in flavor compounds producing for traditional  
23 food fermentation. Whereas, the fluctuation of natural microbiota results in the  
24 inconstancy of food quality. Thus, it is critical to reveal the core microbiota for flavor  
25 compounds producing and construct a synthetic core microbiota for constant food  
26 fermentation. Here, we revealed the core microbiota based on their flavor-producing and  
27 co-occurrence performance, using Chinese light aroma type liquor as a model system.  
28 Five genera were identified to be the core microbiota, including *Lactobacillus*,  
29 *Saccharomyces*, *Pichia*, *Geotrichum*, and *Candida*. The synthetic core microbiota of these  
30 five genera presented a reproducible dynamic profile with that in the natural microbiota.  
31 Monte Carlo test showed that the interpretation of five environmental factors (lactic acid,  
32 ethanol and acetic acid contents, moisture and pH) on the synthetic microbiota distribution  
33 were highly significant ( $P < 0.01$ ), which was similar with that in the natural fermentation  
34 system. In addition, 77.27% of the flavor compounds produced by the synthetic core  
35 microbiota showed a similar dynamic profile ( $\rho > 0$ ) with that in the natural liquor  
36 fermentation process, and the flavor profile presented a similar composition. It indicated that  
37 the synthetic core microbiota is efficient for reproducible flavor metabolism. This work  
38 established a method for identifying core microbiota and constructing a synthetic microbiota  
39 for reproducible flavor compounds. It is of great significance for the tractable and constant  
40 production of various fermented foods.

41

42 **IMPORTANCE**

43 The transformation from natural fermentation to synthetic fermentation is essential to  
44 construct a constant food fermentation process, which is the premise for stably making  
45 high-quality food. According to the functions of flavor-producing and co-occurring in

46 dominant microbes, we provided a system-level approach to identify the core microbiota  
47 in Chinese light aroma type liquor fermentation. In addition, we successfully constructed  
48 a synthetic core microbiota to simulate the microbial community succession and flavor  
49 compounds production in the *in vitro* system. The constructed synthetic core microbiota  
50 could not only facilitate a mechanistic understanding of the structure and function of the  
51 microbiota, but also be beneficial for constructing a tractable and reproducible food  
52 fermentation process.

53

54 **KEYWORDS:** Chinese liquor, Co-occurring network, Core microbiota, Environmental  
55 factors, Flavor compounds, Food fermentation

56

---

57 **INTRODUCTION**

58 Traditional fermented foods are usually produced by natural fermentation containing  
59 multi-species community (1-4). At present, the transformation from natural fermentation to  
60 tractable fermentation with the synthetic core microbiota is essential for consistent quality of  
61 fermented foods because only limited genera of microbes in natural microbiota can drive the  
62 fermentation process. They not only generate flavor compounds but also maintain microbes'  
63 interaction, which serve to achieve the successful food fermentation (5, 6). Thus, revealing  
64 the composition of these microbes, that is the core microbiota, is essential for constructing a  
65 synthetic microbiota in food fermentation (7).

66 A series of studies were carried out to identify the core microbiota during food fermentation  
67 (7-10). Dominant genera were considered to be an essential component in the food  
68 fermentation (11, 12). For example, a total of 17 genera were identified to be dominant  
69 microbes due to their relative abundance in cheese (11). However, dominant genera may not  
70 have the ability to produce flavor compounds in food fermentation (13, 14). Researchers  
71 suggested that the identification of core microbiota should also consider the microbial flavor  
72 compounds productivity (7, 15). For example, seven genera were determined as functional  
73 core microbiota for production of flavor compounds in Chinese vinegar fermentation (7).

74 Recently, we found that only the dominant microbes or flavor-producing microbes did not  
75 show efficient flavor compounds productivity when they were in a mixed culture (13).

76 Whereas, some other microbes were not flavor compound producers, but they showed the  
77 activity to coordinate with those flavor-producing microbes, hence leading to an  
78 improvement of flavor compounds (13). For example, *Pichia membranaefaciens* and *Bacillus*  
79 *amyloliquefaciens* were not efficient flavor compound producers, but they alleviated the

---

80 competition among flavor compound producers (*Saccharomyces cerevisiae*, *Issatchenkia*  
81 *orientalis* and *Bacillus licheniformis*), and finally altered the producers' growth and flavor  
82 compound productions (13). Moreover, the interaction between microbes plays a vital role in  
83 some flavor metabolisms, such as 3-(methylthio)-1-propanol and dimethyl disulfide (16). As  
84 a consequence, we suggest that besides the flavor compounds productivity, the microbial  
85 interaction should also be considered to identify the core microbiota. Moreover, microbial  
86 interaction is a critical factor for maintaining the co-occurring in microbial communities, and  
87 co-occurring network analysis is an effective tool for studying the microbial interaction (17,  
88 18).

89 Thus, to overcome the problem of inaccurate definition of core microbiota in fermented  
90 foods, we provided a comprehensive method to identify the core microbiota in natural food  
91 fermentation, with the combination of flavor-production and co-occurring network analysis.  
92 We also took a prudent way to examine the activity of the core microbiota, including its  
93 interaction with the environmental factors, and the flavor compound producing. Due to  
94 the Chinese light aroma type liquor is a favorite alcoholic beverage and generated by a  
95 natural fermentation process (19). In this work, using Chinese light aroma type liquor  
96 fermentation as a model system, we provided a strategy to identify the core microbiota and  
97 constructed a synthetic microbiota using the core microbiota. Because, Chinese light aroma  
98 type liquor, a typical and popular fermented food, is made from spontaneous fermentation  
99 involving multiple microbes and complex interactions between microbes (12, 20), and this  
100 type of fermentation can produce unique food flavor and taste characteristics (1). And it is  
101 also one of the three typical type liquors in China (Sauce aroma, Strong aroma, and light  
102 aroma type liquor). In addition, it has a smaller brewing container, shorter fermentation time  
103 and easy to observe. So, taking the Chinese liquor as a model system and establishing a  
104 method to define the core microbiota are beneficial for constructing a synthetic microbiota to

---

105 reveal the mechanism of fermented foods.

106

## 107 **RESULTS**

108 **Microbial diversity during the fermentation process.** Across all samples, altogether  
109 453,217 and 677,563 high-quality sequences were identified for bacteria and fungi after  
110 quality control. Meanwhile, a total of 722 and 1,504 operational taxonomic units (OTUs)  
111 were obtained for bacteria and fungi with 97% similarity. A total of 49 bacterial genera and  
112 34 fungal genera were identified in the fermentation process (Dataset S1). All the Good's  
113 coverage of samples were over 99.80% (Table S1) that indicated sequences represented the  
114 majority of microbiota in the fermentation process (21). The average bacterial  $\alpha$ -diversity  
115 (Chao1 richness and Shannon diversity) declined along with fermentation time on the whole,  
116 but there was a fluctuation on day 15 (Table S1). On the contrary, the average fungi  
117  $\alpha$ -diversity (Chao1 richness and Shannon diversity) increased along with fermentation time  
118 on the whole, but there was a fluctuation on day 5 (Table S1).

119 As for bacteria (Fig. 1A), at the early stage of fermentation (0 day), *Pseudomonas* and  
120 *Bacillus* were the predominant genera (average abundance  $\geq 10\%$ ) (22), whereas  
121 *Lactobacillus*, *Pediococcus*, *Leuconostoc*, *Weissella*, *Stenotrophomonas*, *Staphylococcus*,  
122 *Streptomyces*, *Kroppenstedtia*, *Herbaspirillum*, *Achromobacter*, *Flavobacterium* and  
123 *Brevibacterium* were subdominant genera ( $1\% \leq$  average abundance  $\leq 10\%$ ). During middle  
124 stage of fermentation (day 5-15), *Lactobacillus* and *Pediococcus* became the predominant  
125 genera, and *Leuconostoc* was the subdominant genus at day 15. At the late stage of  
126 fermentation (day 20-28), only *Lactobacillus* was the predominant genus, *Pediococcus*  
127 became the subdominant genus. As for fungi (Fig. 1B), *Pichia* was the predominant genus in  
128 the whole fermentation process. *Geotrichum* (day 5-10) and *Saccharomyces* (day 10) were  
129 the predominant genera, and *Saccharomycopsis*, *Rhizopus*, *Clavispora*, *Candida*, *Aspergillus*,

---

130 *Thermomyces*, *Thermoascus*, *Trichosporon*, and *Lichtheimia* were the subdominant genera at  
131 different stages of fermentation.

132 Through statistical analysis of all communities sampled, only 17 bacterial and 16 fungal  
133 genera were found at greater than 1% average abundance, which were defined as dominant  
134 microbiota (9). A ubiquitously distributed microbiota is usually defined as being present in  
135 most samples (9, 23). Therefore, we defined microbes, which exist in more than 50% samples  
136 within a total of 14 samples, as ubiquitously distributed microbiota (9). Two genera of  
137 bacteria (*Lactobacillus* and *Pediococcus*) and eight genera of fungi (*Pichia*, *Geotrichum*,  
138 *Saccharomyces*, *Saccharomycopsis*, *Rhizopus*, *Aspergillus*, *Candida* and *Thermoascus*) were  
139 identified to be ubiquitously distributed dominant microbiota (Table S2).

140

141 **Identification of the core microbiota.** Flavor compounds are very important indicators of  
142 the liquor quality (24, 25). A total of 41 kinds of flavor compounds were identified during the  
143 fermentation (Fig. 2), including four alcohols, two carbonyl compounds, five acids, 20 esters,  
144 nine aromatic compounds and one heterocyclic compound.

145 Concentrations of flavor compounds were transformed and converted into a heat map, and  
146 hierarchical cluster analysis was achieved. As shown in Fig. 2, the hierarchical clustering  
147 results showed that the fermentation process consisted of three-part based on the dynamic  
148 profile of flavor compounds: part 1 (day 0), part 2 (days 5-20) and part 3 (days 20-28).

149 Most flavor compounds are related to microbes in food fermentation. Network correlation  
150 analysis is a powerful tool to investigate the potential interactions between microbes and  
151 flavor compounds (26). Thus, we calculated the Spearman correlation coefficient between 33  
152 dominant genera and 41 flavor compounds, and chose the coefficient ( $\rho$ ) > 0.5 and

---

153 significance ( $P$ ) < 0.05 (27, 28) as strongly correlated nodes of the network (Fig. 3 A). Eight  
154 bacterial and seven fungal genera were significantly correlated ( $P$  < 0.05,  $\rho$  > 0.5) with 34  
155 kinds of flavor compounds, indicating these 15 genera are the flavor-producing microbiota  
156 (Table S3). Among them, *Lactobacillus*, *Saccharomyces*, *Clavispora* and *Candida* were  
157 significantly correlated ( $P$  < 0.05,  $\rho$  > 0.5) with 26, 26, 16 and 14 kinds of flavor compounds,  
158 respectively (Fig. 3 A).

159 Co-occurrence network analysis allows identifying the co-occurring microbiota (17). We  
160 calculated the Spearman correlation coefficient of 33 dominant genera. The Spearman's  
161 correlation coefficient ( $|\rho|$ ) > 0.5 and significance ( $P$ ) < 0.05 was considered to be a valid  
162 co-occurrence event (17, 18, 26, 29, 30). Through the co-occurrence network analysis, a total  
163 of 25 nodes and 149 edges were obtained ( $|\rho|$  > 0.5,  $P$  < 0.05), and the average network  
164 clustering coefficient was 0.696, which suggested that the network had modular structures. In  
165 Fig. 3 B, different genera are divided into different modular structures. A total of 23 genera  
166 presented highly connection ( $\geq 4$  edges per node) (26), and were defined as the co-occurring  
167 microbiota, including *Flavobacterium*, *Lactobacillus*, *Brevibacterium*, *Herbaspirillum*,  
168 *Pichia*, *Staphylococcus*, *Bacillus*, *Weissella*, *Kroppenstedtia*, *Leuconostoc*, *Saccharomyces*,  
169 *Aspergillus*, *Clavispora*, *Geotrichum*, *Lichtheimia*, *Thermoascus*, *Rhizopus*, *Achromobacter*,  
170 *Pseudomonas*, *Stenotrophomonas*, *Candida*, *Saccharomycopsis* and *Streptomyces* (Table S4).  
171 In the co-occurrence network, *Lactobacillus* and *Saccharomyces* were mainly negatively  
172 correlated ( $\rho$  < - 0.5) with other microbes (excepting *Clavispora*), but they showed a positive  
173 correlation with each other.

174 In summary, we obtained ubiquitously distributed dominant microbiota (10 genera),  
175 flavor-producing microbiota (15 genera) and co-occurring microbiota (23 genera). Five  
176 genera existed in all these three different microbiotas, including *Lactobacillus*,  
177 *Saccharomyces*, *Geotrichum*, *Candida* and *Pichia* (Fig. 3 C). Due to their high relative



---

178 abundance and frequency, the contributions to flavor productions and the stable microbial  
179 network, they were defined as core microbiota in liquor fermentation.

180 The impact of five environmental factors on the core microbiota were analyzed, including  
181 lactic acid content, ethanol content, acetic acid content, moisture and pH (Table S5). Variation  
182 partitioning analysis (31) was used to calculate the contributions of these environmental  
183 factors. The results showed that these five environmental factors accounted for 87.18% of  
184 core microbiota's variation in the *in situ* systems (Table S6). Partial redundancy analysis  
185 (RDA) was used to identify the effect of these factors on the core microbiota (Fig. 3 D).  
186 Acetic acid content, ethanol content, and lactic acid content were positively correlated with  
187 *Lactobacillus*, *Saccharomyces* and *Candida* at the end of fermentation. Monte Carlo  
188 replacement test (Table S7) verified the result that these factors were significantly correlated  
189 with the core microbiota ( $P < 0.05$ ). It indicated these five environmental factors had a  
190 significant influence on the core microbiota.

191

192 **Reproducible dynamic profile of microbiota in synthetic core microbiota.** In this study,  
193 we provided a system-level approach to identify the core microbiota in Chinese light aroma  
194 type liquor fermentation, and obtained five different core genera during the whole  
195 fermentation stage, including *Lactobacillus*, *Pichia*, *Geotrichum*, *Candida* and  
196 *Saccharomyces*. Due to the diversity of genera, it was considered to be feasible that isolated  
197 species represented certain taxa. For example, cheese rind isolates that represented the most  
198 abundant taxa were applied to construct *in vitro* communities of cheese rind (9). Using 16S  
199 and ITS amplification sequence data, when the sequence identity was greater than 99%  
200 compared to the type and reference strains, the assignment to the species level was performed  
201 (32). Thus, we identified one species with the highest relative abundance in each  
202 corresponding genera (Fig. S1 and Table S8) and used as the starter species of the synthetic

---

203 microbiota, including *Lactobacillus acetotolerans*, *Pichia kudriavzevii*, *Geotrichum*  
204 *candidum*, *Candida vini* and *Saccharomyces cerevisiae*. *Lactobacillus acetotolerans* is a  
205 functional microorganism in the fermentation of kinds of liquors (Strong aroma, light aroma  
206 type liquor and Japanese sake) (32-34). For example, *Lactobacillus acetotolerans* appeared to  
207 play a key role during the Chinese strong aroma type liquor fermentation (32), and it had  
208 positive relationships with most chemical components that contribute to the quality and flavor  
209 of liquor (35). *Pichia kudriavzevii* contribute to the functionality (acids and esters) of foods  
210 during fermentation, and it can improve the sensory and some functional properties of the  
211 cereal-based substrate during fermentation (36). *Geotrichum candidum*, can produce lipases,  
212 which would be important for the productions of fruity aroma compounds (37). *Candida vini*  
213 had been shown to contribute to fatty acids (38). *Saccharomyces cerevisiae* is an important  
214 strain of ethanol fermentation in Chinese liquor fermentation (39). Therefore, we chose the  
215 five species for the synthetic experiment.

216 We inoculated approximately equal numbers of each species in the five core genera  
217 together into fermented grains in the *in vitro* system (Fig. 4 A). *Lactobacillus* became the  
218 predominant genus in the *in vitro* system as fermentation proceeded (Fig. 4 A and Fig. S2 B),  
219 which was similar with that of the *in situ* system (Fig. S2 A, Fig. S3). *Saccharomyces* and  
220 *Pichia* were the dominant genera in the early (1-5 d) and end (28 d) of the fermentation  
221 process, which was similar with that of the *in situ* system (Fig. 4 A, Fig. S2 C and Fig. S2 D).  
222 *Candida* was the dominant genera in the middle fermentation process (10-25 d). It revealed  
223 that the successive direction of the *in vitro* systems (Fig. 4 B) in the principal component is  
224 consistent with that of the *in situ* system over a 28 d fermentation period (Fig. 4 C), which  
225 demonstrated a highly reproducible microbial succession pattern of the *in vitro* liquor  
226 fermentation.

227 The impact of the environmental factors on the synthetic microbiota were also analyzed

---

228 (Table S9). Explanations of variation partitioning analysis of the five environmental  
229 factors (lactic acid content, ethanol content, acetic acid content, moisture and pH) reached  
230 53.65% in the *in vitro* system (Table S6). This percentage showed that these five factors  
231 drove the variation of the synthetic core microbiota. RDA analysis showed that pH was  
232 negatively correlated with the other environmental factors that was the same with that in the  
233 *in situ* system (Fig. 5 A). Lactic acid content, acetic acid content, ethanol content and  
234 moisture were positively correlated with each other that are consistent with that of the *in situ*  
235 system. Monte Carlo test also showed that the interpretation of these five environmental  
236 factors on the synthetic microbiota distribution were highly significant ( $P < 0.01$ ) (Table  
237 S7). Through the change of environmental factors' correlation analysis of the two systems on  
238 the temporal dynamics ( Fig. 5 B), we found that five environmental factors had a positive  
239 correlation ( $\rho > 0$ ) with the core microbiota, especially, moisture, acetic acid content, lactic  
240 acid content and pH had a strong correlation ( $\rho > 0.6$ ) between in the *in situ* and *in vitro*  
241 systems. These results indicated that the effect of environmental factors on the core  
242 microbiota was also similar in the *in vitro* and *in situ* systems.

243

244 **Reproducible flavor metabolism in synthetic core microbiota.** The flavor compound  
245 producing in the synthetic microbiota was determined, and 22 flavor compounds were  
246 identified in the *in situ* system (Fig. 6 A). The *in vitro* generation of flavor compounds can  
247 be divided into three parts (Fig. S4): part 1 (day 0-3), part 2 (day 4-10), part 3 (day 15-28).  
248 The temporal dynamics was similar to that in the *in situ* system.

249 The Spearman correlation coefficient ( $\rho$ ) of the 22 flavor compounds generation in the two  
250 systems was calculated in the fermentation. The result showed that 17 kinds of flavor  
251 compounds (ratio = 77.27%) had a positive correlation ( $\rho > 0$ ) with the generation on the  
252 temporal dynamics in the two systems (Fig. 6 A). The ratio of different flavor classifications

---

253 had similar proportions in both systems (Fig. 6 B), in which the ratio of alcohols and acids  
254 accounted for more than 99.85% in the total flavor compounds. These indicated that the  
255 flavor metabolism could be reproduced in the *in vitro* system with the synthetic core  
256 microbiota.

257

## 258 **DISCUSSION**

259 Core microbiota inhabiting in food fermentation is of great importance to the quality and  
260 characteristics of foods. Many molecular and ecological approaches have been used to  
261 characterize the core microbiota (22, 40-42). In this work, we chose microbial communities  
262 in Chinese light aroma type liquor fermentation as a model system and provided a  
263 system-level method to identify the core microbiota in natural food fermentation. Taking a  
264 prudent way examined the characteristics of all the dynamic succession of the microbiota,  
265 the effect of the environmental factors, and the profile of flavor compounds production.  
266 Among these compounds, we did not detect the detrimental flavors in Chinese light aroma  
267 type liquor fermentation. Most of these flavors have pleasant aromatic smells, such as  
268 ethyl acetate (pineapple), ethyl lactate (fruity), 1-Octen-3-ol (mushroom), octanoic acid  
269 (cheesy), ethyl 3-phenylpropanoate (floral),  $\gamma$ -nonanolactone (coconut), etc. (43, 44).  
270 Although some of these flavors also contain some unpleasant flavors, but these flavors  
271 form a special style of products at low concentrations, such as acetic acid (acidic, vinegar),  
272 hexanoic acid (sweaty), ethyl oleate (fatty), 3-methyl-1-butanol (malty), etc. (43, 44). We  
273 constructed a reproducible synthetic core microbiota, with that of the natural microbiota  
274 for liquor fermentation. It would help us to establish a tractable food fermentation system.

275 In the *in vitro* system, alcohols (without ethanol) and acid contents were a bit higher than  
276 those in the *in situ* system (Dataset S2, Dataset S3). Whereas, ester contents were lower than  
277 that in the *in situ* system ( $P < 0.001$ ). That may be due to the low concentration of

---

278 esterification strains in the *in vitro* system. We also observed slight differences in the  
279 microbiota between the *in situ* and *in vitro* systems. For example, a succession of  
280 *Saccharomyces* appeared to proceed much more quickly (Fig. S2 C, S2 D), and *Candida*  
281 showed a higher relative abundance in the later fermentation in the *in vitro* system (Fig. 4,  
282 Fig. S2 D). The difference might result from a higher initial ratio of these genera in the *in*  
283 *vitro* system. Therefore, the initial compositions of the core microbiota should be optimized  
284 in the further synthetic core microbiota's fermentation. Different species and different strains  
285 of microorganisms under the same genus may have different metabolic functions. Therefore,  
286 more functional strains should be isolated. But the same strain in single fermentation and  
287 mixed fermentation may show completely different metabolic patterns (16). Therefore, the  
288 target functional strains should be synthetically optimized by extensive statistical analysis.

289 Besides the liquor fermentation system, the methods for identifying the core microbiota  
290 and constructing a synthetic microbiota for food fermentation can also be used in a variety of  
291 food fermentation processes. Various food fermentations share the members of the core  
292 microbiota because these members present similar functions in different food fermentations.  
293 For example, *Lactobacillus* was confirmed to be the core microbe in fermentations of vinegar,  
294 liqueur, cheese, pickle, and so on (45-47). It contributed amino acids (glutamic acid, alanine,  
295 valine, etc.), organic acids (acetic acid, lactic acid, etc.), and other flavor compounds (7,  
296 48-50). It would also interact with other microbes, such as *Bacillus*, *Aspergillus* and  
297 *Luteococcus*, hence regulate their flavor compounds producing (47, 50-52). *Pichia* was  
298 widely used in food fermentation, such as wine and beer fermentation (53-55). It was  
299 considered to be an essential producer of esters (56). *Pichia* can also maintain the  
300 co-occurring of the community (13), which was similar to that in Fig 3 B. *Geotrichum* can  
301 produce lipases, which would be important for the productions of fruity aroma compounds,  
302 such as ethyl esters of acetic acid, propionic acid, butyric acid and isobutyric acid (57, 58).

---

303 *Saccharomyces*, as an ethanol producer, was widely used in liquor and other alcoholic  
304 beverages' production (59). It drove the development direction of the microbiota, together  
305 with *Lactobacillus* (acid producer) (60, 61). *Candida* was widely used in food fermentations,  
306 due to its production of various lipases (antarctica lipase A, rugosa lipases, glucose ester  
307 synthesis lipase, etc.) (62-64). When *Candida* and *Saccharomyces* were co-cultured in wine  
308 fermentation, they produced higher amounts of esters and glycerol, compared with that of  
309 single *Saccharomyces* (65). These studies indicated that most of the microbes in the core  
310 microbiota had similar functions in different food fermentations.

311 The transformation from natural fermentation to synthetic fermentation is essential to  
312 construct a tractable food fermentation process, which is the premise for stably making  
313 high-quality foods. We provided a system-level approach to identify the core microbiota in  
314 food fermentation and constructed a synthetic microbiota for reproducible flavor metabolism.  
315 It would provide a chance for us to define the mechanisms underlying the microbial  
316 interaction and contribution to flavor compounds in the food microbiota. It is also important  
317 to manipulate the synthetic microbiota and then control the quality of fermented foods.

318

## 319 MATERIALS AND METHODS

320 **Sample collection.** Samples were collected from a local liquor distillery (Shanxi  
321 Xinghuacun Fenjiu Distillery Co. Ltd. Shanxi, China,). For liquor fermentation, the steamed  
322 grains were mixed with starter at a ratio of 9:1 (w/w) and put into earthenware jars. Then, the  
323 jars were sealed for 28 days' fermentation. For the survey of microbial diversity, a total of 12  
324 samples (100 g each sample) were collected from 2 jars in the center of the layer (0.5 m deep)  
325 at different fermentation times (day 0, 5, 10, 15, 20, and 28) in April 2016. All samples were  
326 stored at - 20°C for further DNA extraction and physicochemical parameters determination.

327

---

328     **DNA extraction, qualification and sequencing analysis.** Each sample (5.00 g) was used  
329 to extract genomic DNA using the E.Z.N.A.<sup>®</sup> soil DNA Kit (Omega Bio-tek, Norcross, GA)  
330 according to manufacturer's instruction. The V3-V4 region of the 16S rRNA bacterial gene  
331 was amplified with the universal primers 338F (5'-ACTCCTACGGGAGGCAGCAG-3') and  
332 806R (5'-GACTACHVGGGTWTCTAAT-3') (66). For fungi, the ITS2 region was amplified  
333 with the primers of ITS2 (5'- GCTGCGTTCTTCATCGATGC -3') and ITS3 (5'-  
334 GCATCGATGAAGAACGCAGC -3') (67). These primers added a set of 8-nucleotide  
335 barcodes sequence unique to each sample. The PCR reactions were performed in 25  $\mu$ L  
336 volume, containing 2.5  $\mu$ L of 10  $\times$  Pyrobest Buffer, 2  $\mu$ L of 2.5 mM dNTPs, 1  $\mu$ L of each  
337 primer (10  $\mu$ M), 0.4 U of Pyrobest DNA Polymerase (TaKaRa, Takara Holdings Inc.,  
338 Nojihigashi, Kusatsu, Shiga, Japan), 15 ng of template DNA, and double-distilled water  
339 (ddH<sub>2</sub>O) up to 25  $\mu$ L. Amplification was performed with the previously described method (42,  
340 68). Then applicants were pooled into equimolar quantities and subjected to high-throughput  
341 sequencing using Miseq Benchtop Sequencer for 2  $\times$  300 bp pair-end sequencing (Illumina,  
342 San Diego, CA). Databases of EzBioCloud and Central Bureau of Fungal Cultures  
343 (CBS-KNAW) were used for sequence alignment of bacteria and fungus. The fungi and  
344 bacterial raw sequences data were deposited in the DNA Data Bank of Japan (DDBJ)  
345 database under the accession number of DRA005471 and DRA005916.

346

347     **Population determination by real-time quantitative PCR (qPCR).** The population of  
348 yeast and LAB in liquor fermentation were determined by qPCR. Genomic DNA of samples  
349 were used as the templates. For yeast, the sequences were amplified using YEASTF (5'  
350 GAGTCGAGTTGTTTGGGAATGC 3') and YEASTR (5'  
351 TCTCTTTTCCAAAGTTCTTTTCATCTTT 3') (69) as primers. For LAB, the sequences  
352 were amplified using Lac1 (5; AGCAGTAGGGAATCTTCCA 3') and Lac2 (5'

---

353 ATTYCACCGCTACACATG 3') (70) as primers. qPCR was performed by the StepOnePlus  
354 instrument (Applied Biosystems, CA, USA) (16).

355

356 **Sequence processing.** All the raw Miseq-generated sequences were processed via QIIME (V.  
357 1.8) (71). Briefly, high-quality sequences was carried out by removing sequences with  
358 ambiguous bases > 2, homopolymers > 10, primer mismatches, average quality scores < 20  
359 and lengths (excluding the primer or barcode region) < 50 bp. Chimeras were removed using  
360 USEARCH (v. 10) (72). The trimmed sequences were clustered into operational taxonomic  
361 units (OTUs) with 97% sequence (73), and then calculated Shannon index and Chao1  
362 estimator using UCLUST (V. 1.2.22) (74, 75).

363

364 **Analysis of environmental factors and flavor compounds.** Moisture was measured by  
365 determining its weight loss after drying 10 g of each sample at 105°C for 3 h (sufficient to  
366 ensure constant weight) (76). The pH was measured at a 1:2.5 (w/v) ratio in  
367 distillation-distillation H<sub>2</sub>O (ddH<sub>2</sub>O) with the Laboratory pH meter-FE20 (Mettler Toledo,  
368 Shanghai, China) (76). Five-gram samples were added to 10 mL ddH<sub>2</sub>O and put in an  
369 ultrasonic cleaner (AS30600B, Autoscience, Tianjin, China) for 30 min, and then centrifuged  
370 at 8000 × g for 10 min. After filtered using a 0.2 μm filter, the filtrate was used to analyze the  
371 concentrations of flavor compounds and acids. The flavor compounds content was detected  
372 using gas chromatography-mass spectrometry (Agilent 6890N GC system and Agilent 5975  
373 mass selective detector, Agilent, Santa Clara, CA) (42). The ethanol content was determined  
374 by high-performance liquid chromatography (HPLC, Agilent 1200, Agilent, Santa Clara, CA)  
375 using a column aminex HPX-87H (Bio-Rad, Hercules, CA) (77). The contents of lactic acid



---

376 and acetic acid were measured using reversed-phase ultra-performance liquid  
377 chromatography (UPLC, Waters H-class system, Waters, Milford, MA) with chromatographic  
378 column waters Atlantis T3 (4.6 mm×150 mm, 3 μm) (Waters, Milford, MA) and guard  
379 column Phenomenex RP-C<sub>18</sub> Security Guard (4.0 mm×3.0 mm) (Phenomenex Inc. Torrance,  
380 CA). The UV detection wavelength was 210 nm. The column temperature was 30°C. The  
381 injection volume was 10 μL. The mobile phase was 10 mmol/L NaH<sub>2</sub>PO<sub>4</sub> (pH 2.7), and the  
382 flow velocity was 0.8 mL/min.

383

384 **Strains.** Predominant microbes were all isolated from the liquor fermentation process,  
385 *Lactobacillus acetotolerans*, *Pichia kudriavzevii* and *Candida vini* were deposited in China  
386 General Microbiological Culture Collection Center with the accession number of CGMCC  
387 No. 14086 and 12418 and 2.2018. *Saccharomyces cerevisiae* was deposited in China Center  
388 for Type Culture Collection with the accession number of CCTCC M2014463. *Geotrichum*  
389 *candidum* is a laboratory strain with the number of XY7.

390

391 **Liquid fermentation.** The sorghum extract was used as seed fermentation broth (40). The  
392 extract was diluted with distilled water to give a sugar concentration of about 90 g/L and then  
393 autoclaved at 115°C for 15 min. 100 mL of medium was added in 150 mL conical flasks,  
394 inoculated with a ring of target strain, and then incubated for 48 h at 30°C (yeast) and 24 h at  
395 37°C (LAB). The microscopy was used to continuously count until obtained 10<sup>8</sup> CFU/mL  
396 seed fermentation broth. **Solid-state fermentation.** Sorghum (400 g) was added to 500 mL of  
397 water in the 3000 L beaker, and mixed the liquefied enzyme (10 U/g) in boiling water (100°C)  
398 for 2 h, and then added glucoamylase (50 u/g) maintaining 4 h at 60°C. Reducing sugar of the  
399 sorghum extracts about 50 ~ 90 g/kg. The beaker autoclaved at 115°C for 15 min. After  
400 cooling, seed fermentation broth was added in the beaker with the cellular population of

---

401  $1 \times 10^5$  CFU/g wet sorghum, and then experiments were carried out in 150 mL conical flasks  
402 which contained 100 g of sorghum. The flasks were then sealed and incubated at 30°C. In  
403 order not to interrupt the fermentation process, 30 flasks were used to fermented according to  
404 the above experimental conditions, and three flasks were randomly selected from the same  
405 fermentation conditions at 1, 2, 3, 4, 5, 10, 15, 20, 25 and 28 days respectively. After  
406 fermentation, the sorghums were used enumeration of different strains, and the rest withdrew  
407 and stored at - 20°C for analysis of environmental factors and flavor compounds.

408 **Enumeration of different strains.** After fermentation, 10 g sorghums were added to 25  
409 mL phosphate buffer saline (PBS, 0.01M, pH7.2), vortex mix 3000 rpm for 30 s (Dragonlab  
410 MX-E, Beijing, China), and under 4 °C for 30 min. The supernatant was gradient diluted and  
411 spread plate. Four kinds of yeasts enumeration were carried out on Wallerstein Laboratory  
412 nutrient (WLN) medium (78), in which the strains showed different macroscopic features  
413 (texture, surface, margin, and color),. *Lactobacillus* enumeration was carried out on MRS  
414 Broth (DE MAN, ROGOSA, SHARPE) (34). Standard deviations were calculated from  
415 triplicate repetitions of the enumeration.

416 **Statistical analysis.** Standard statistical analyses were conducted with XLSTAT  
417 (v.19.02.42992). Heatmap, Variation partitioning analysis, Redundancy analysis (RDA), the  
418 Monte Carlo permutation test was calculated by the R program (v. 3.4.0). In the Heatmap,  
419 flavor compounds were transformed by z-score. Clustering analysis was performed using the  
420 Pearson correlation coefficient, and Euclidean distance based on the flavor compounds  
421 content during the fermentation process. The Variation partitioning analysis resulted in five  
422 environmental factors and five microbes' average abundance. In constrained ordination,  
423 representational difference analysis (RDA) was used to identify the relationship of samples,  
424 environmental factors and microbes. The Monte Carlo permutation test was used to examine  
425 the significance of the correlation between environmental factors and species distribution. All

---

426 the analyses were performed using functions in the Vegan package (v. 2.4-3) (79). The  
427 Spearman correlation coefficient ( $\rho$ ) and Paired-sample t-test were calculated with SPSS  
428 Statistics 22, in which  $\rho > 0.6$  and  $\rho > 0.8$  were representing strongly and highly correlated.  
429 The visualization objects of interaction of flavor compounds and microbes and co-occurring  
430 analysis were drawn with Gephi (v. 0.9.1) (22).

431

## 432 **SUPPLEMENTAL MATERIAL**

433 SUPPLEMENTAL FILE S1.

434 DATASET S1, XLSX file.

435 DATASET S2, XLSX file.

436 DATASET S3, XLSX file.

437

## 438 **ACKNOWLEDGMENTS**

439 We would like to thank Shanxi Xinghuacun Fenjiu Distillery Co., Ltd. for the samples,  
440 Peng Wang and Jianchun Lin for statistical methods and sample collection.

441

## 442 **FUNDING**

443 This work was supported by the National Natural Science Foundation of China (NSFC)  
444 (31530055), National Key R&D Program of China (2018YFD0400402, 2016YFD0400500),  
445 Jiangsu Province Science and Technology Project (BE2017705), China Postdoctoral Science  
446 Foundation (2017M611702), the Postgraduate Research & Practice Innovation Program of  
447 Jiangsu Province (KYCX18\_1798), and national first-class discipline program of Light  
448 Industry Technology and Engineering (LITE2018-12), the Priority Academic Program  
449 Development of Jiangsu Higher Education Institutions, the 111 Project (111-2-06), the  
450 Collaborative Innovation Center of Jiangsu Modern Industrial Fermentation.

---

451 The authors declare that there are no conflicts of interest.

---

452 REFERENCES:

- 453 1. Smid EJ, Lacroix C. 2013. Microbe-microbe interactions in mixed culture food  
454 fermentations. *Curr Opin Biotech* 24:148-154.
- 455 2. Bokulich NA, Thorngate JH, Richardson PM, Mills DA. 2014. Microbial biogeography of  
456 wine grapes is conditioned by cultivar, vintage, and climate. *PNAS* 111:139-148.
- 457 3. Meersman E, Steensels J, Mathawan M, Wittcox PJ, Saels V, Struyf N, Bernaert H, Vrancken  
458 G, Verstrepen KJ. 2013. Detailed analysis of the microbial population in malaysian  
459 spontaneous cocoa pulp fermentations reveals a core and variable microbiota. *PLoS ONE*  
460 8:e81559.
- 461 4. Rodríguez-Lerma GK, Gutiérrez-Moreno K, Cárdenas-Manríquez M, Botello-Álvarez E,  
462 Jiménez-Islas H, Rico-Martínez R, Navarrete-Bolaños JL. 2011. Microbial ecology studies  
463 of spontaneous fermentation: starter culture selection for prickly pear wine production. *J*  
464 *Food Sci Technol* 76:M346–M352.
- 465 5. Holzapfel W. 2002. Appropriate starter culture technologies for small-scale fermentation in  
466 developing countries. *Int J Food Microbiol* 75:197-212.
- 467 6. Giraffa G. 2004. Studying the dynamics of microbial populations during food fermentation.  
468 *FEMS Microbiol Rev* 28:251-260.
- 469 7. Wang ZM, Lu ZM, Shi JS, Xu ZH. 2016. Exploring flavour-producing core microbiota in  
470 multispecies solid-state fermentation of traditional Chinese vinegar. *Sci Rep* 6:26818.
- 471 8. Sieuwerts S, de Bok FA, Hugenholtz J, Je VHV. 2008. Unraveling microbial interactions in  
472 food fermentations: from classical to genomics approaches. *Appl Environ Microbiol*

- 473 74:4997-5007.
- 474 9. Wolfe BE, Button JE, Santarelli M, Dutton RJ. 2014. Cheese rind communities provide  
475 tractable systems for in situ and in vitro studies of microbial diversity. *Cell* 158:422-433.
- 476 10. De Filippis F, La Stora A, Stellato G, Gatti M, Ercolini D. 2014. A selected core  
477 microbiome drives the early stages of three popular Italian cheese manufactures. *PLoS ONE*  
478 9:e89680.
- 479 11. Wolfe BE, Dutton RJ. 2015. Fermented foods as experimentally tractable microbial  
480 ecosystems. *Cell* 161:49-55.
- 481 12. Hu XL, Du H, Ren C, Yan X. 2016. Illuminating anaerobic microbial community and  
482 cooccurrence patterns across a quality gradient in Chinese liquor fermentation pit muds.  
483 *Appl Environ Microbiol* 82:2506-2515.
- 484 13. Wu Q, Ling J, Xu Y. 2014. Starter culture selection for making Chinese sesame-flavored  
485 liquor based on microbial metabolic activity in mixed-culture fermentation. *Appl Environ*  
486 *Microbiol* 80:4450-4459.
- 487 14. Armstrong MS, Boyd CE, Lovell RT. 1986. Environmental factors affecting flavor of  
488 channel catfish from production ponds. *The Progressive Fish-Culturist* 48:113-119.
- 489 15. Pothakos V, Illegheems K, Laureys D, Spitaels F, Vandamme P, De Vuyst L. 2016. Acetic  
490 acid bacteria in fermented food and beverage ecosystems, p 73-99, *Acetic Acid Bacteria*.  
491 Springer.
- 492 16. Liu J, Wu Q, Wang P, Lin JC, Huang L, Xu Y. 2017. Synergistic effect in core microbiota  
493 associated with sulfur metabolism in spontaneous Chinese liquor fermentation. *Appl*

- 
- 494 Environ Microbiol 83:e01475-17.
- 495 17. Cardinale M, Grube M, Erlacher A, Quehenberger J, Berg G. 2015. Bacterial networks and  
496 co-occurrence relationships in the lettuce root microbiota. Environ Microbiol 17:239-252.
- 497 18. Parente E, Cocolin L, De Filippis F, Zotta T, Ferrocino I, O'Sullivan O, Neviani E, De  
498 Angelis M, Cotter PD, Ercolini D. 2016. FoodMicrobionet: A database for the visualisation  
499 and exploration of food bacterial communities based on network analysis. Int J Food  
500 Microbiol 219:28-37.
- 501 19. Jin GY, Zhu Y, Xu Y. 2017. Mystery behind Chinese liquor fermentation. Trends Food Sci  
502 Tech 63:18-28.
- 503 20. Zhang CL, Ao ZH, Chui WQ, Shen CH, Tao WY, Zhang SY. 2012. Characterization of the  
504 aroma-active compounds in *Daqu*: a tradition Chinese liquor starter. Eur Food Res Technol  
505 234:69-76.
- 506 21. Lemos LN, Fulthorpe RR, Triplett EW, Roesch LF. 2011. Rethinking microbial diversity  
507 analysis in the high throughput sequencing era. J Microbiol Methods 86:42-51.
- 508 22. Wang X, Du H, Xu Y. 2017. Source tracking of prokaryotic communities in fermented grain  
509 of Chinese strong-flavor liquor. Int J Food Microbiol 244:27-35.
- 510 23. Rui JP, Li JB, Zhang SH, Yan XF, Wang YP, Li XZ. 2015. The core populations and  
511 co-occurrence patterns of prokaryotic communities in household biogas digesters.  
512 Biotechnol Biofuels 8:158-173.
- 513 24. Gao WJ, Fan WL, Xu Y. 2014. Characterization of the key odorants in light aroma type  
514 Chinese liquor by gas chromatography–olfactometry, quantitative measurements, aroma

- 515 recombination, and omission studies. *J Agric Food Chem* 62:5796-5804.
- 516 25. Cao Y, Hu Y. 2010. Variation of Aromatic Components in Solid Phase Fermented Grains  
517 During Fermentation of Fen Liquor. *Food Sci* 31:367-371.
- 518 26. Barberan A, Bates ST, Casamayor EO, Fierer N. 2012. Using network analysis to explore  
519 co-occurrence patterns in soil microbial communities. *ISME J* 6:343-351.
- 520 27. De Filippis F, Genovese A, Ferranti P, Gilbert JA, Ercolini D. 2016. Metatranscriptomics  
521 reveals temperature-driven functional changes in microbiome impacting cheese maturation  
522 rate. *Sci Rep* 6:21871.
- 523 28. Steinhäuser D, Krall L, Müssig C, Büssis D, Usadel B. 2007. *Correlation Networks,*  
524 *Analysis of Biological Networks.* John Wiley & Sons, Inc.
- 525 29. Yang J, Leskovec J. 2014. Overlapping communities explain core–periphery organization  
526 of networks. *P IEEE* 102:1892-1902.
- 527 30. Ercolini D, Pontonio E, Filippis FD, Minervini F, Storia AL, Gobbetti M, Cagno RD. 2013.  
528 Microbial ecology dynamics during rye and wheat sourdough preparation. *Appl Environ*  
529 *Microbiol* 79:7827-7836.
- 530 31. Yang Y, Gao Y, Wang S, Xu D, Yu H, Wu L, Lin Q, Hu Y, Li X, He Z. 2014. The microbial  
531 gene diversity along an elevation gradient of the Tibetan grassland. *ISME J* 8:430.
- 532 32. De Bruyn F, Zhang SJ, Pothakos V, Torres J, Lambot C, Moroni AV, Callanan M, Sybesma  
533 W, Weckx S, De Vuyst L. 2017. Exploring the impacts of postharvest processing on the  
534 microbiota and metabolite profiles during green coffee bean production. *Appl Environ*  
535 *Microbiol* 83:e02398-16.



- 536 33. Tang J, Tang X, Tang M, Zhang X, Xu X, Yi Y. 2017. Analysis of the Bacterial  
537 Communities in Two Liquors of Soy Sauce Aroma as Revealed by High-Throughput  
538 Sequencing of the 16S rRNA V4 Hypervariable Region. *Biomed Res Int* 2017:1-9.
- 539 34. Yang X, Teng K, Jie Z, Wang F, Tong Z, Ai G, Han P, Bai F, Jin Z. 2017. Transcriptome  
540 responses of *Lactobacillus acetotolerans* F28 to a short and long term ethanol stress. *Sci Rep*  
541 7:2650.
- 542 35. Toh H, Morita H, Tsuji H, Iwashita K, Goto N, Nakayama J, Sekine M, Kato Y, Suzuki K,  
543 Fujita N. 2015. Complete genome sequence of *Lactobacillus acetotolerans* RIB 9124  
544 (NBRC 13120) isolated from putrefied (hiochi) Japanese sake. *J Biotechnol* 214:214-215.
- 545 36. Wu Q, Zhu W, Wang W, Xu Y. 2015. Effect of yeast species on the terpenoids profile of  
546 Chinese light-style liquor. *Food Chem* 168:390-395.
- 547 37. Tian X, Cui H, Wang X. 2016. Research Progress on the Application of the Fermentation  
548 Products of *Geotrichum candidum*. *Anhui Agr Sci Bull* 22:31-32.
- 549 38. Noronhadacosta P, Spencermartins I, Loureiro V, Rodrigues C. 2010. Fatty acid patterns of  
550 film-forming yeasts and new evidence for the heterogeneity of *Pichia membranaefaciens*.  
551 *Lett Appl Microbiol* 23:79-84.
- 552 39. Gong GL, Ma LY, Chen XF. 2014. Isolation and improvement of *Saccharomyces cerevisiae*  
553 for producing the distilled liquor. *J Chem Pharm Res* 6:283-288.
- 554 40. Kong Y, Wu Q, Zhang Y, Xu Y. 2014. *In situ* analysis of metabolic characteristics reveals  
555 the key yeast in the spontaneous and solid-state fermentation process of Chinese light-style  
556 liquor. *Appl Environ Microbiol* 80:3667-3676.

- 
- 557 41. Hu XL, Wang HY, Wu Q, Xu Y. 2014. Development, validation and application of specific  
558 primers for analyzing the clostridial diversity in dark fermentation pit mud by PCR-DGGE.  
559 Bioresource Technol 163:40-47.
- 560 42. Wang P, Wu Q, Jiang X, Wang Z, Tang J, Xu Y. 2017. *Bacillus licheniformis* affects the  
561 microbial community and metabolic profile in the spontaneous fermentation of *Daqu* starter  
562 for Chinese liquor making. Int J Food Microbiol 250:59-67.
- 563 43. Gao W, Fan W, Xu Y. 2014. Characterization of the Key Odorants in Light Aroma Type  
564 Chinese Liquor by Gas Chromatography–Olfactometry, Quantitative Measurements, Aroma  
565 Recombination, and Omission Studies. Agric Food Chem 62:5796-5804.
- 566 44. Niu Y, Yao Z, Xiao Q, Xiao Z, Ma N, Zhu J. 2017. Characterization of the key aroma  
567 compounds in different light aroma type Chinese liquors by GC-olfactometry, GC-FPD,  
568 quantitative measurements, and aroma recombination. Food Chem 233:204-215.
- 569 45. Monnet C, Dugat-Bony E, Swennen D, Beckerich J-M, Irlinger F, Fraud S, Bonnarme P.  
570 2016. Investigation of the activity of the microorganisms in a reblochon-style Cheese by  
571 metatranscriptomic analysis. Front Microbiol 7:536.
- 572 46. Li S, Li P, Liu X, Luo LX, Lin WF. 2016. Bacterial dynamics and metabolite changes in  
573 solid-state acetic acid fermentation of Shanxi aged vinegar. Appl Environ Microbiol  
574 100:4395-4411.
- 575 47. Kable ME, Srisengfa Y, Laird M, Zaragoza J, McLeod J, Heidenreich J, Marco ML. 2016.  
576 The core and seasonal microbiota of raw bovine milk in tanker trucks and the impact of  
577 transfer to a milk processing facility. Mbio 7:e00836-16.

- 578 48. Annan NT, Poll L, Sefa-Dedeh S, Plahar WA, Jakobsen M. 2003. Volatile compounds  
579 produced by *Lactobacillus fermentum*, *Saccharomyces cerevisiae* and *Candida krusei* in  
580 single starter culture fermentations of Ghanaian maize dough. *J Appl Microbiol* 94:462-474.
- 581 49. Laakso K, Koskenniemi K, Koponen J, Kankainen M, Surakka A, Salusjärvi T, Auvinen P,  
582 Savijoki K, Nyman TA, Kalkkinen N. 2011. Growth phase-associated changes in the  
583 proteome and transcriptome of *Lactobacillus rhamnosus* GG in industrial-type whey  
584 medium. *Microb Biotechnol* 4:746-766.
- 585 50. Wang PX, Mao J, Meng XY, Li XZ, Liu YY, Feng H. 2014. Changes in flavour  
586 characteristics and bacterial diversity during the traditional fermentation of Chinese rice  
587 wines from Shaoxing region. *Food Control* 44:58-63.
- 588 51. Li P, Li S, Cheng L, Luo L. 2014. Analyzing the relation between the microbial diversity of  
589 *Daqu* and the turbidity spoilage of traditional Chinese vinegar. *Appl Environ Microbiol*  
590 98:6073-84.
- 591 52. Almeida M, Hébert A, Abraham A-L, Rasmussen S, Monnet C, Pons N, Delbès C, Loux V,  
592 Batto J-M, Leonard P, Kennedy S, Ehrlich SD, Pop M, Montel M-C, Irlinger F, Renault P.  
593 2014. Construction of a dairy microbial genome catalog opens new perspectives for the  
594 metagenomic analysis of dairy fermented products. *BMC Genomics* 15:1101-1116.
- 595 53. Balat M. 2011. Production of bioethanol from lignocellulosic materials via the biochemical  
596 pathway: A review. *Energ Convers Manage* 52:858-875.
- 597 54. Mattanovich D, Sauer M, Gasser B. 2016. Industrial microorganisms: *Pichia pastoris*, p  
598 687-714, *Ind Biotechnol*, Wiley-Blackwell.

- 
- 599 55. Saerens S, Swiegers JH. 2017. Production of low-alcohol or alcohol-free beer with *Pichia*  
600 *kluveri* yeast strains. Google Patents.
- 601 56. Rojas V, Gil JV, Piñaga F, Manzanares P. 2001. Studies on acetate ester production by  
602 non-*Saccharomyces* wine yeasts. *Int J Food Microbiol* 70:283-289.
- 603 57. Veeraragavan K, Colpitts T, Gibbs B. 1990. Purification and Characterization of 2 Distinct  
604 Lipases from *Geotrichum-Candidum*. *J Am Ceram Soc* 95:2140-2147.
- 605 58. Burkert JF, Maugeri F, Rodrigues MI. 2004. Optimization of extracellular lipase production  
606 by *Geotrichum* sp. using factorial design. *Bioresource Technol* 91:77-84.
- 607 59. Sukpipat W, Komeda H, Prasertsan P, Asano Y. 2017. Purification and characterization of  
608 xylitol dehydrogenase with l -arabitol dehydrogenase activity from the newly isolated  
609 pentose-fermenting yeast *Meyerozyma caribbica* 5XY2. *J Biosci Bioeng* 123:20-27.
- 610 60. Bourrie BC, Willing BP, Cotter PD. 2016. The microbiota and health promoting  
611 characteristics of the fermented beverage kefir. *Front Microbiol* 7:674.
- 612 61. Gethins L, Guneser O, Demirkol A, Rea MC, Stanton C, Ross RP, Yuceer Y, Morrissey JP.  
613 2015. Influence of carbon and nitrogen source on production of volatile fragrance and  
614 flavour metabolites by the yeast *Kluyveromyces marxianus*. *Yeast* 32:67-76.
- 615 62. Ren K, Lamsal BP. 2017. Synthesis of some glucose-fatty acid esters by lipase from  
616 *Candida antarctica* and their emulsion functions. *Food Chem* 214:556-563.
- 617 63. Ivić JT, Milosavić N, Dimitrijević A, Jankulović MG, Bezbradica D, Kolarski D,  
618 Veličković D. 2017. Synthesis of medium-chain length capsinoids from coconut oil  
619 catalyzed by *Candida rugosa* lipases. *Food Chem* 218:505-508.

- 620 64. He Y, Li J, Kodali S, Chen B, Guo Z. 2017. Rationale behind the near-ideal catalysis of  
621 *Candida antarctica* lipase A (CAL-A) for highly concentrating  $\omega$ -3 polyunsaturated fatty  
622 acids into monoacylglycerols. *Food Chem* 219:230-239.
- 623 65. Englezos V, Torchio F, Cravero F, Marengo F, Giacosa S, Gerbi V, Rantsiou K, Rolle L,  
624 Cocolin L. 2016. Aroma profile and composition of Barbera wines obtained by mixed  
625 fermentations of *Starmerella bacillaris* (synonym *Candida zemplinina*) and *Saccharomyces*  
626 *cerevisiae*. *LWT-Food Sci Technol* 73:567-575.
- 627 66. Zhang XL, Tian XQ, Ma LY, Feng B, Liu QH, Yuan LD, Fan CQ, Huang HL, Yang Q. 2015.  
628 Biodiversity of the symbiotic bacteria associated with toxic marine dinoflagellate  
629 *Alexandrium tamarense*. *JBM* 3:23-28.
- 630 67. Toju H, Tanabe AS, Yamamoto S, Sato H. 2012. High-coverage ITS primers for the  
631 DNA-based identification of ascomycetes and basidiomycetes in environmental samples.  
632 *PLoS ONE* 7:e40863.
- 633 68. Ren G, Ren W, Teng Y, Li Z. 2015. Evident bacterial community changes but only slight  
634 degradation when polluted with pyrene in a red soil. *Front Microbiol* 6:22.
- 635 69. Gabert J, Beillard E, Vh VDV, Bi W, Grimwade D, Pallisgaard N, Barbany G, Cazzaniga G,  
636 Cayuela JM, Cavé H. 2006. Real-time quantitative PCR (qPCR) and reverse  
637 transcription-qPCR for detection and enumeration of total yeasts in wine. *Appl Environ*  
638 *Microbiol* 72:7148-7155.
- 639 70. Mayrhofer S, Filipp R, Lehner D, Reiterich C, Kneifel W, Domig KJ. 2016. Suitability of  
640 different PCR-DGGE primer sets for the monitoring of lactic acid bacteria in wine. *S Afr J*

- 
- 641 Enol Vitic 35:185-195.
- 642 71. Caporaso JG, Kuczynski J, Stombaugh J, Bittinger K, Bushman FD, Costello EK, Fierer N,  
643 Pena AG, Goodrich JK, Gordon JI, Huttley GA, Kelley ST, Knights D, Koenig JE, Ley RE,  
644 Lozupone CA, McDonald D, Muegge BD, Pirrung M, Reeder J, Sevinsky JR, Turnbaugh PJ,  
645 Walters WA, Widmann J, Yatsunenko T, Zaneveld J, Knight R. 2010. QIIME allows analysis  
646 of high-throughput community sequencing data. *Nat Methods* 7:335-336.
- 647 72. Edgar RC, Haas BJ, Clemente JC, Quince C, Knight R. 2011. UCHIME improves  
648 sensitivity and speed of chimera detection. *Bioinformatics* 27:2194-2200.
- 649 73. Edgar RC. 2010. Search and clustering orders of magnitude faster than BLAST.  
650 *Bioinformatics* 26:2460-2461.
- 651 74. Tao Y, Li J, Rui J, Xu Z, Zhou Y, Hu X, Wang X, Liu M, Li D, Li X. 2014. Prokaryotic  
652 communities in pit mud from different-aged cellars used for the production of Chinese  
653 strong-flavored liquor. *Appl Environ Microbiol* 80:2254-2260.
- 654 75. Edgar RC. 2013. UPARSE: Highly accurate OTU sequences from microbial amplicon  
655 reads. *Nat Methods* 10:996-998.
- 656 76. Li P, Lin W, Liu X, Wang X, Gan X, Luo L, Lin WT. 2017. Effect of bioaugmented  
657 inoculation on microbiota dynamics during solid-state fermentation of *Daqu* starter using  
658 autochthonous of *Bacillus*, *Pediococcus*, *Wickerhamomyces* and *Saccharomycopsis*. *Food*  
659 *Microbiol* 61:83-92.
- 660 77. Wu Q, Chen L, Xu Y. 2013. Yeast community associated with the solid state fermentation  
661 of traditional Chinese *Maotai*-flavor liquor. *Int J Food Microbiol* 166:323-330.

- 662 78. Wu Q, Kong Y, Xu Y. 2015. Flavor profile of Chinese liquor is altered by interactions of  
663 intrinsic and extrinsic microbes. *Appl Environ Microbiol* 82:422-430.
- 664 79. Oksanen J, Kindt R, Legendre P, O'Hara B, Stevens MHH, Oksanen MJ, Suggests M. 2008.  
665 The vegan package, <http://vegan.r-forge.r-project.org/>.  
666

---

667 **Figure captions**

668

669 **Fig. 1. Distribution of the relative abundance of genera during the fermentation in the**  
670 ***in situ* System.** Only those genera that had an average abundance greater than 1% were  
671 indicated. Genera less than 1% abundance were combined and shown in others.

672

673 **Fig. 2. Heatmap of flavor metabolites and hierarchical clustering in the *in situ***  
674 **fermentation process.** Flavor compounds were transformed by z-score. Clustering analysis  
675 was performed using the Pearson correlation coefficient and Euclidean distance based on the  
676 flavor contents during the fermentation process.

677

678 **Fig. 3. Identification of the core microbiota in the *in situ* system.** (A) Correlation network  
679 between microbial genera and flavor compounds during the fermentation process in the *in*  
680 *situ* system. Inner circle nodes represent microbes (light red modules represent bacteria  
681 genera, and light blue modules represent the fungi genera), and outer circle nodes represent  
682 flavor compounds (different colors represent different flavor types). The thickness of lines  
683 are proportional to the value of Spearman's correlation ( $\rho > 0.5$ ,  $P < 0.05$ ). The color of lines  
684 are same with the flavor nodes. (B) Correlation network of co-occurring genera in dominant  
685 microbiota. Statistically significant ( $P < 0.05$ ) and Spearman correlation coefficient ( $|\rho| > 0.5$ )  
686 indicate the correlations. Light red modules represent bacteria genera, and light blue modules  
687 represent fungi genera. Green and red edges indicate negative and positive interaction  
688 between genera. The thickness of lines represents the strength of interaction. (C) The Venn  
689 diagram of the core microbiota. Different circles represent different genera categories. (D)  
690 RDA analysis of fermentation process. Blue dots represent the time of fermentation. Red dots  
691 represent the core microbiota. Black arrows represent the different of environmental factors.



---

692 Percentages on the axis represent the eigenvalues of principal components.

693

694 **Fig. 4. Reproducible dynamic profile of microbiota in synthetic core microbiota. (A)**

695 Distribution of the abundance of genera during the fermentation in the *in vitro* system. (B) *In*

696 *situ*, the change of principal component in time gradient. (C) *In vitro*, the change of principal

697 component in time gradient.

698

699 **Fig. 5. RDA analysis of fermentation process in the *in vitro* system and the relationship**

700 **of environmental factors within the *in situ* system. (A)** RDA analysis of fermentation

701 process in the *in vitro* system (same with Fig. 3D). (B) The similarity of in the *in situ* and *in*

702 *vitro* system. The vertical coordinate in the figure represents the Spearman correlation

703 coefficient between the corresponding of environmental factors in the two systems.

704

705 **Fig. 6. Reproducible flavor metabolism in synthetic core microbiota. (A)** The similarity of

706 two system in 22 kinds of alcohols, acids and esters in two systems. The vertical coordinate

707 in the figure represents the Spearman correlation coefficient ( $\rho$ ) of the flavor generation along

708 the time axis in the two systems. (B) The ratio of six kinds of flavor compounds in the *in situ*

709 and *in vitro* systems.

710

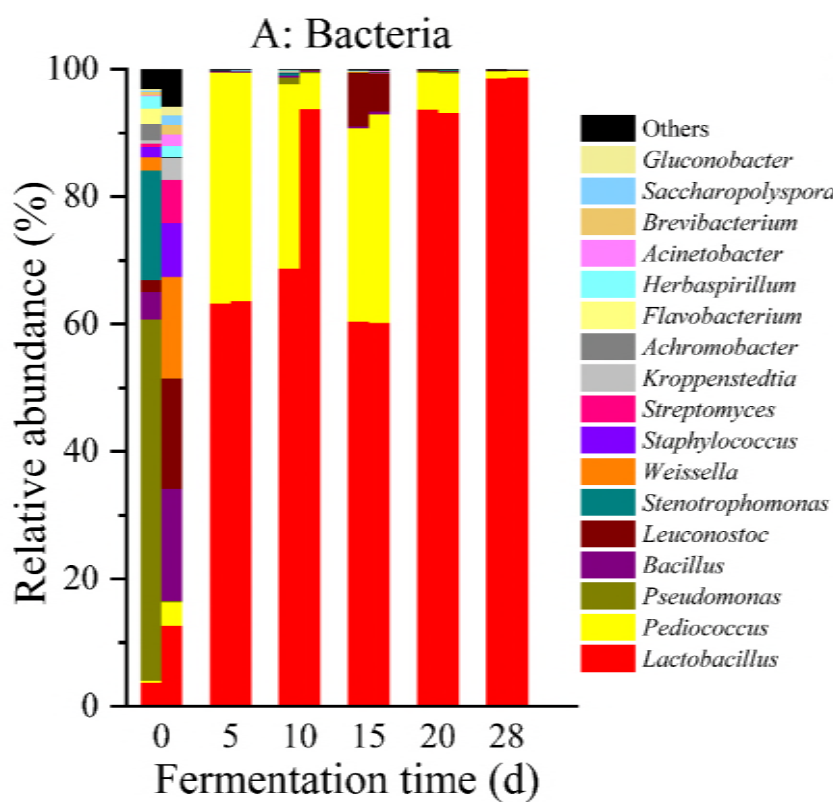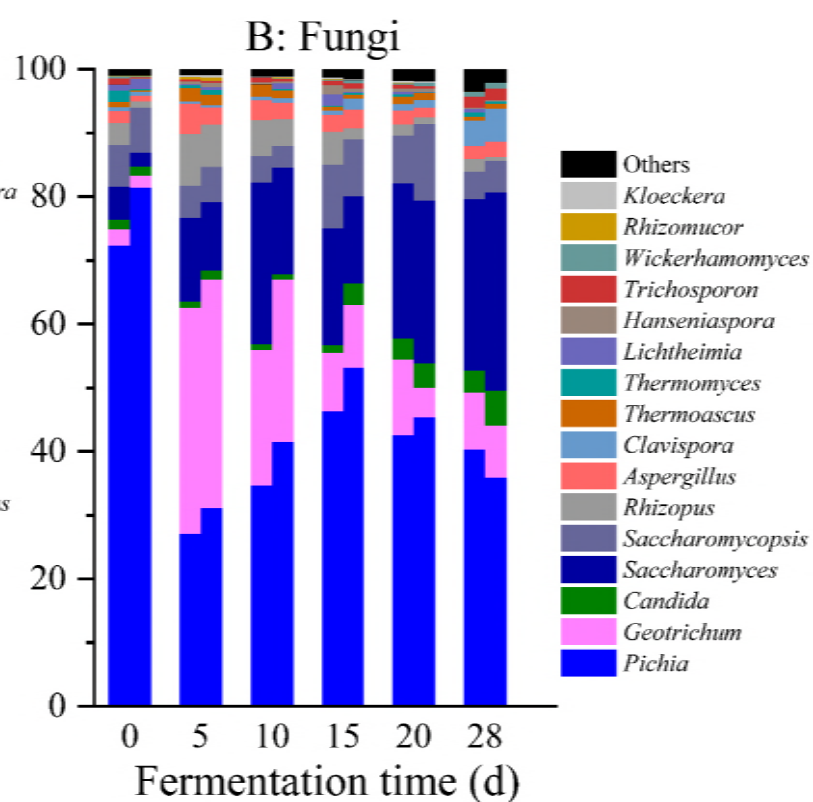

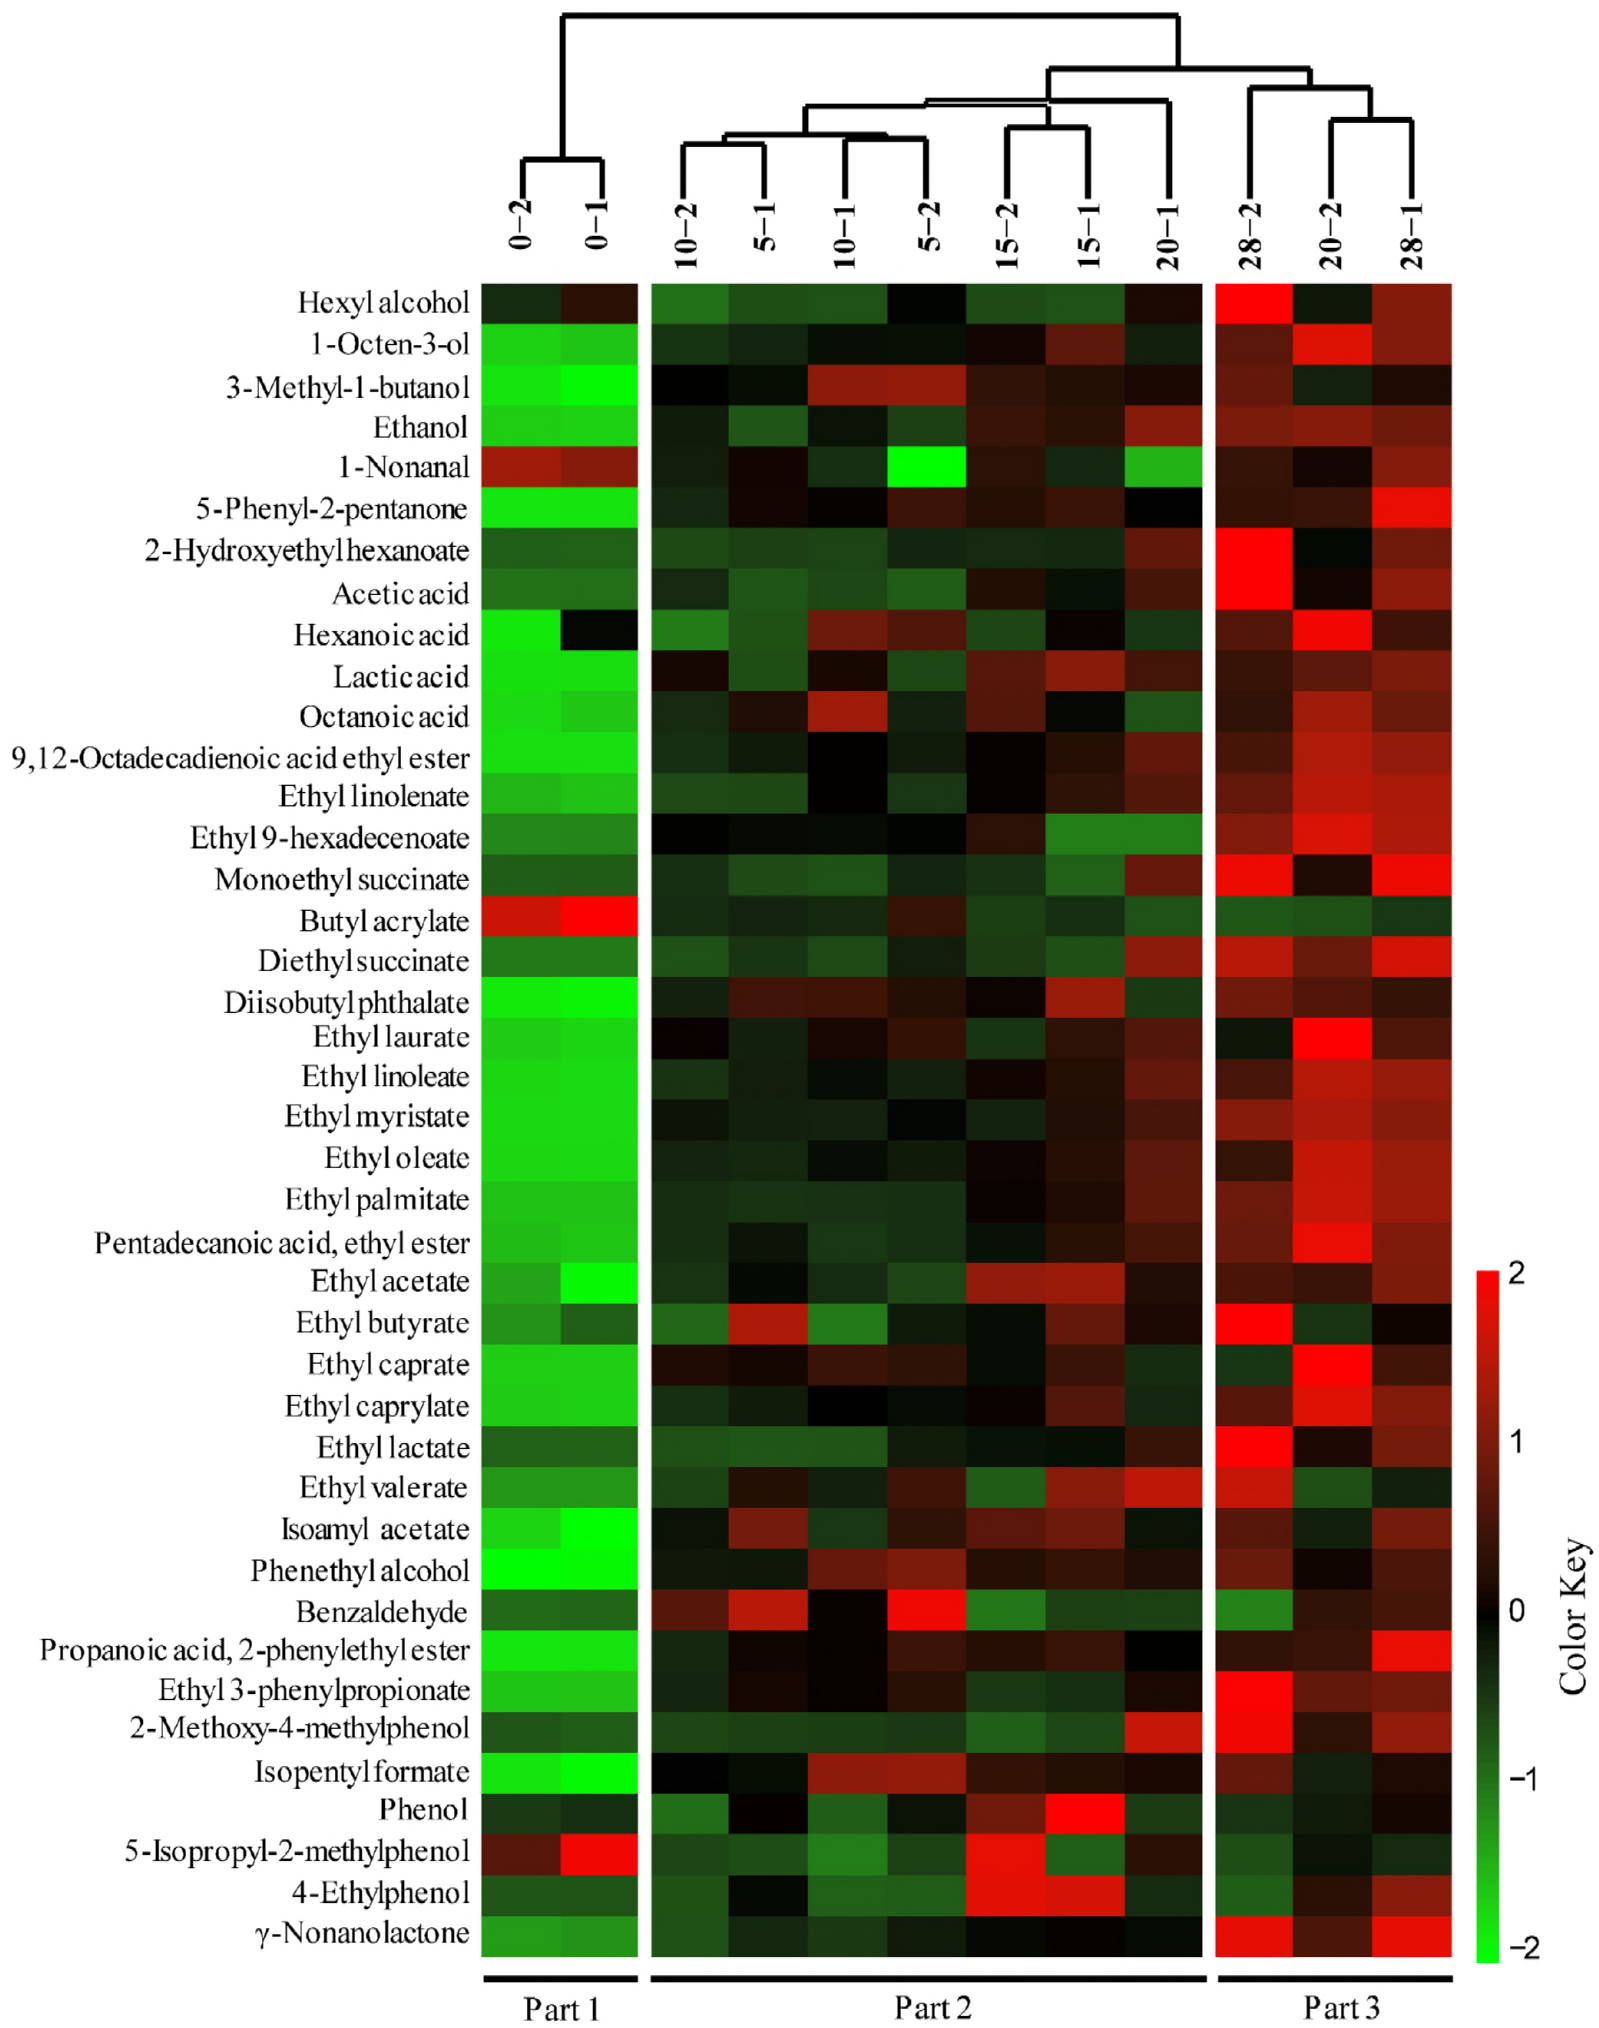

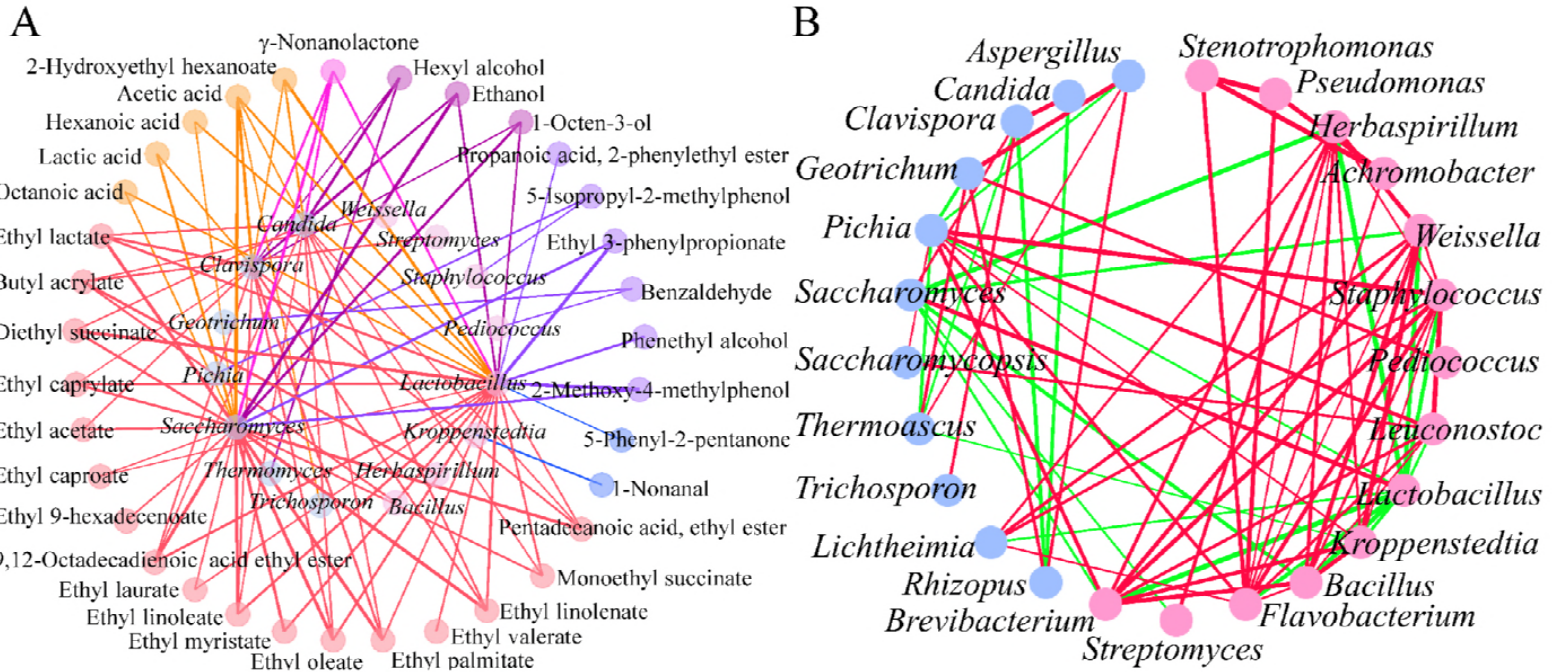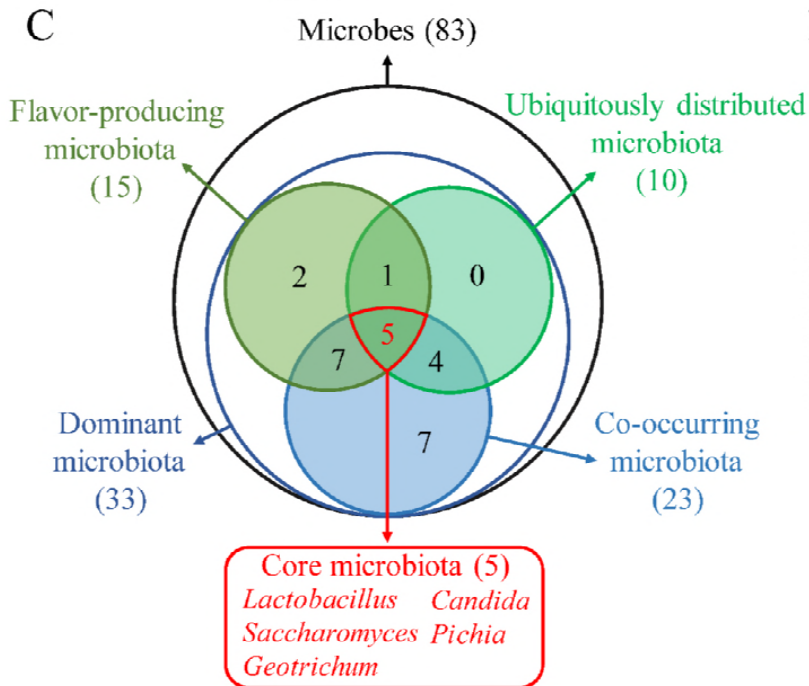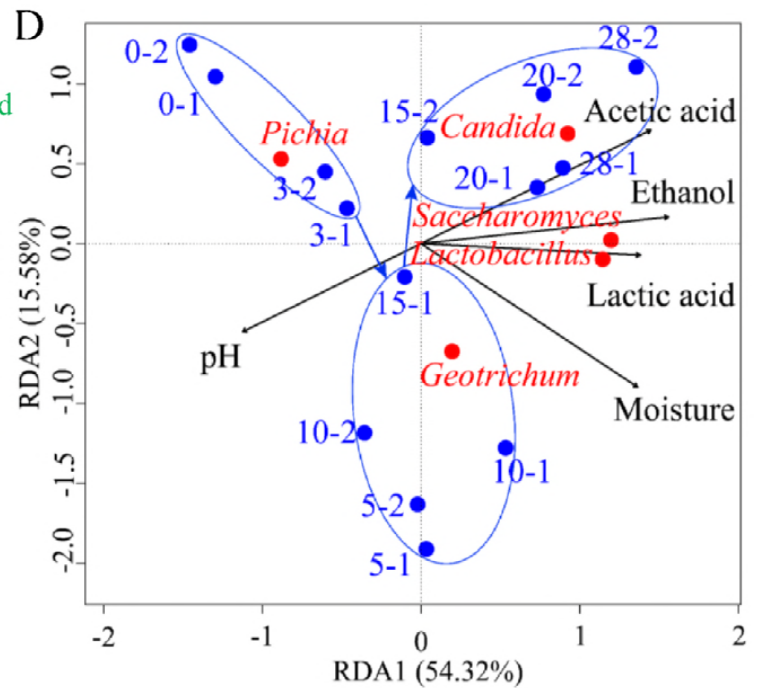

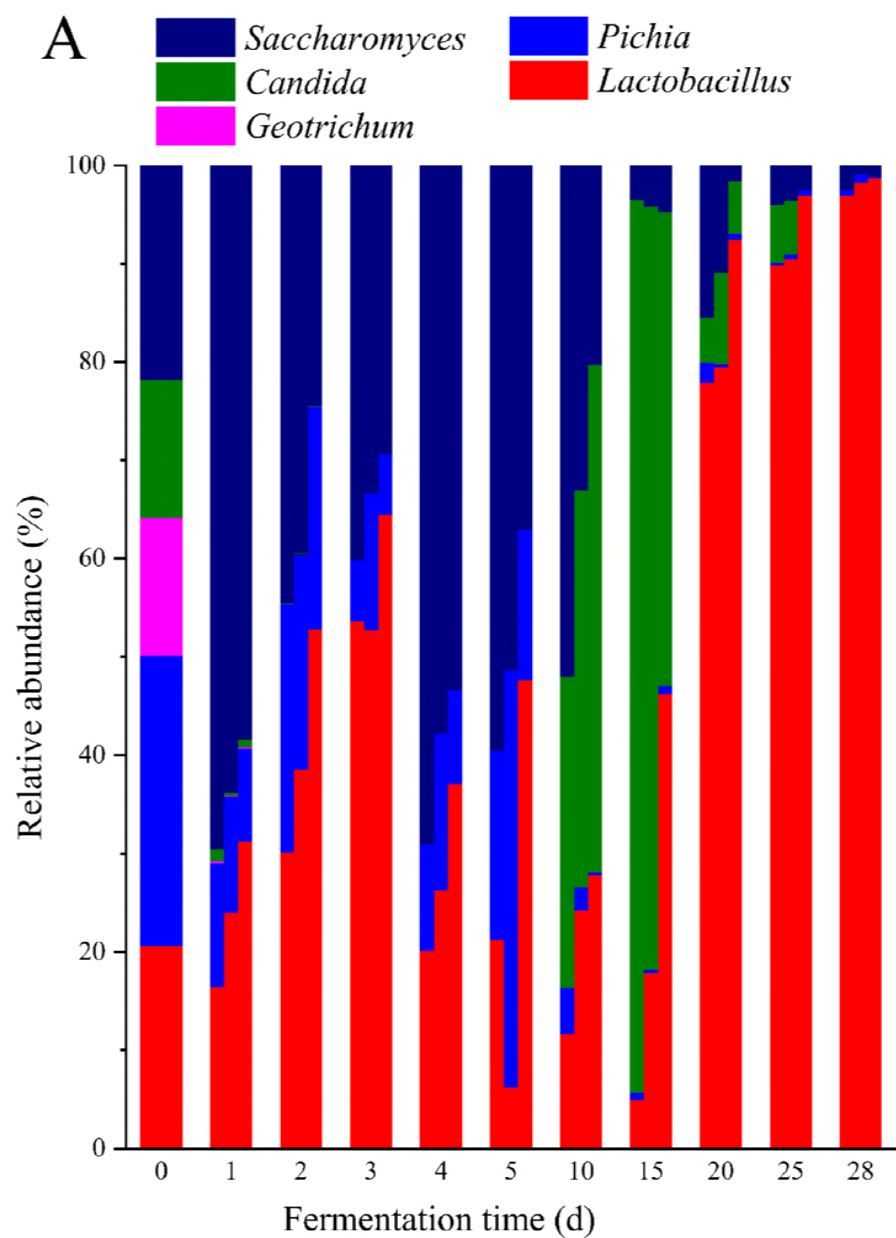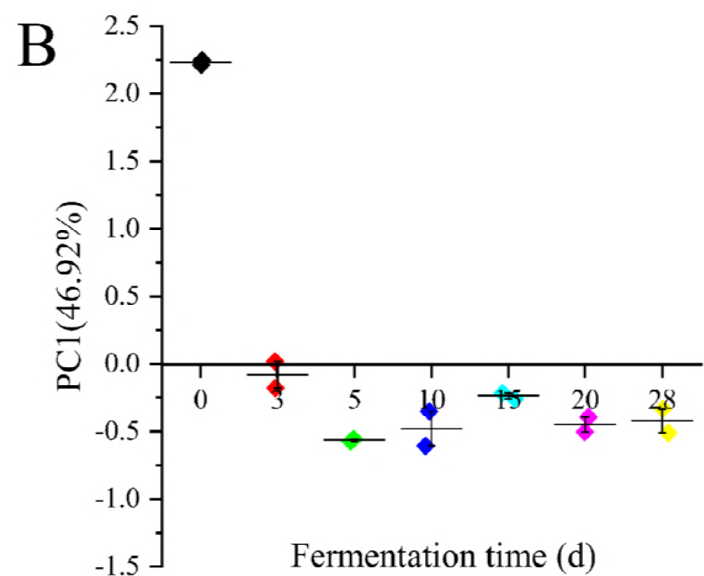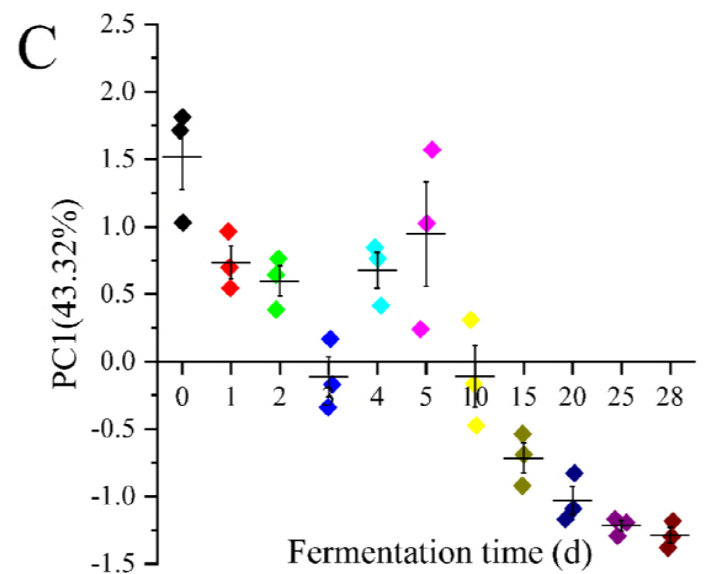

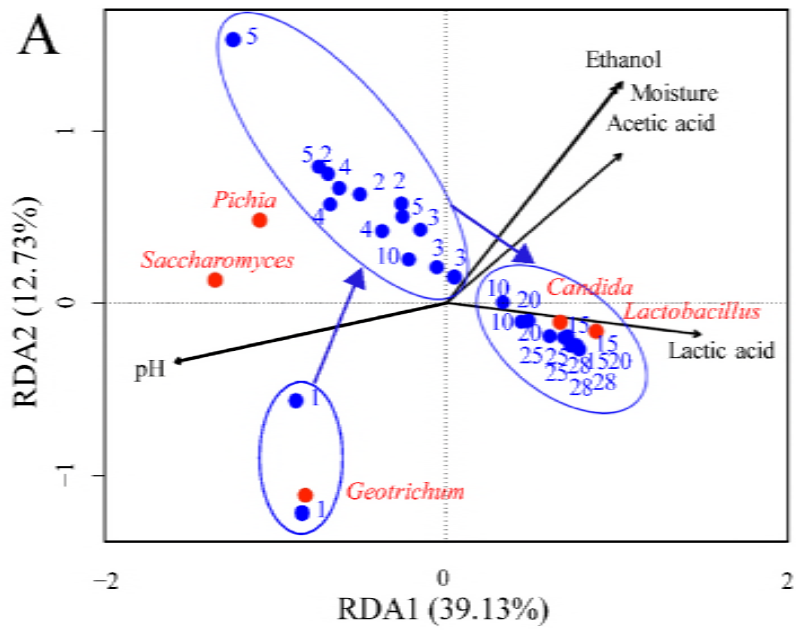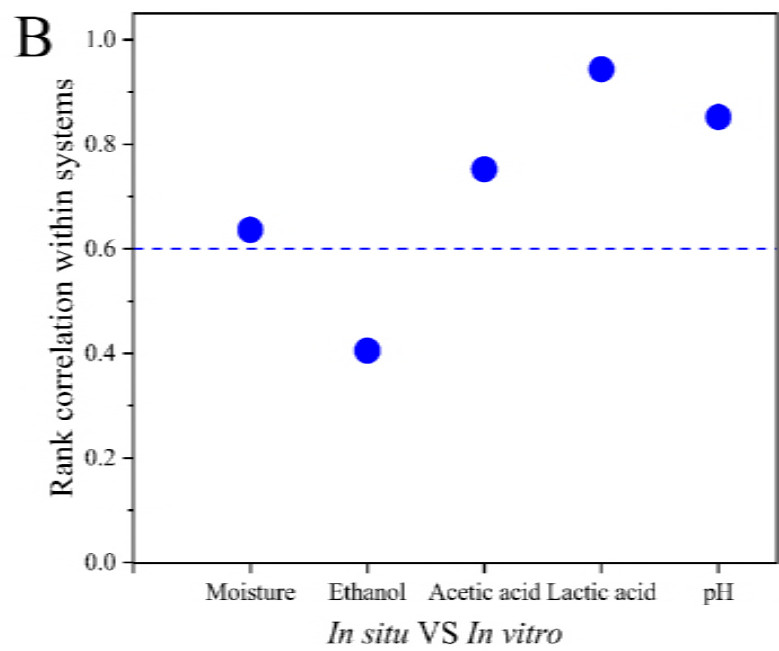

A

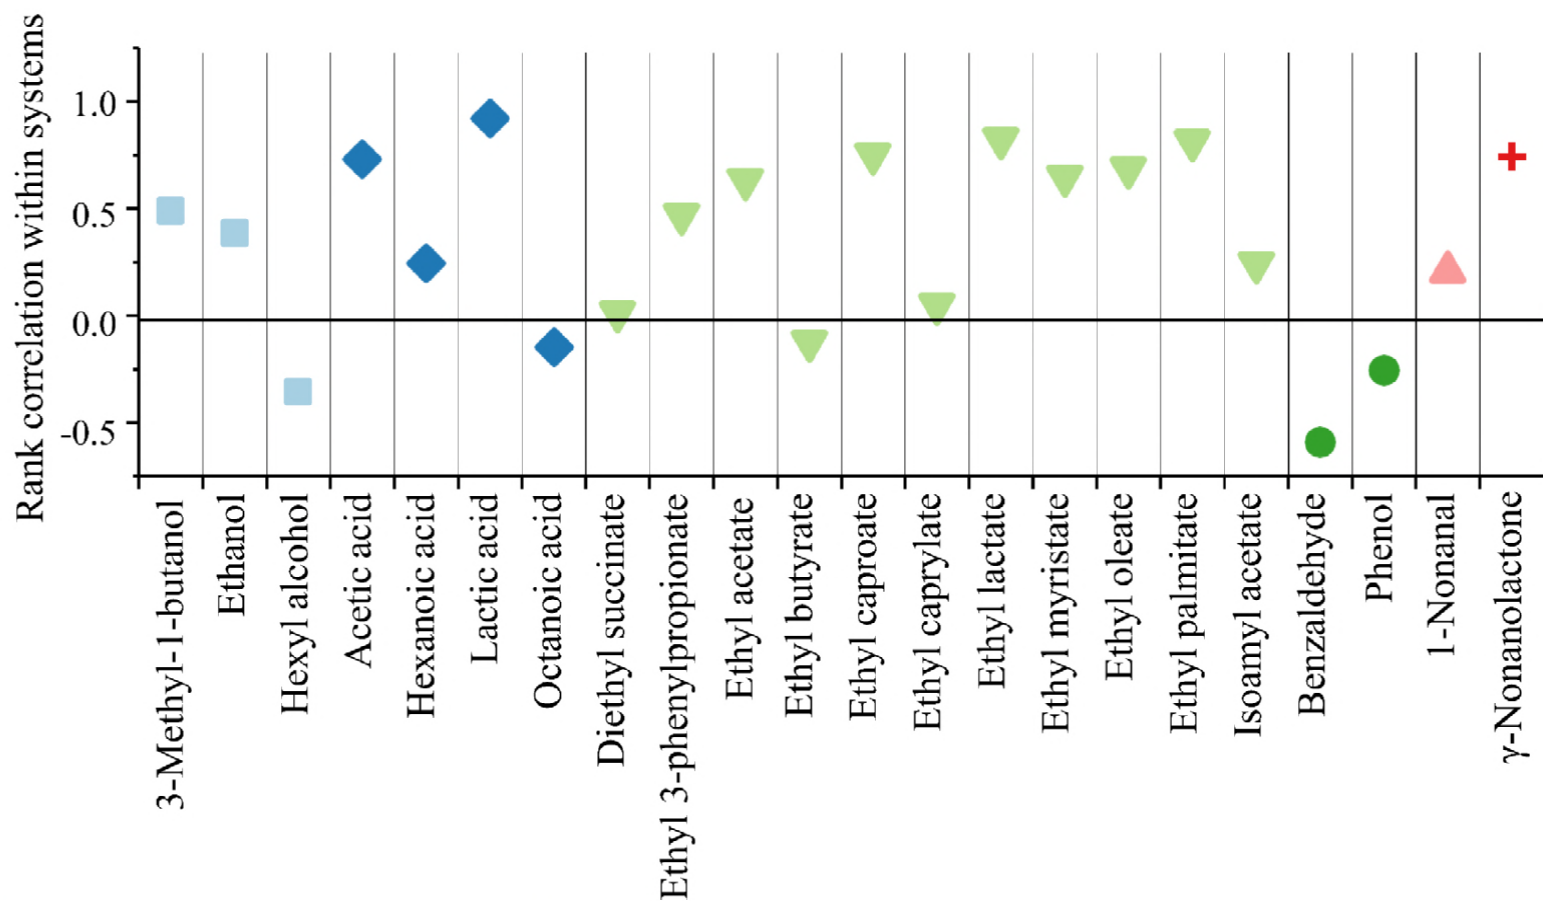

B

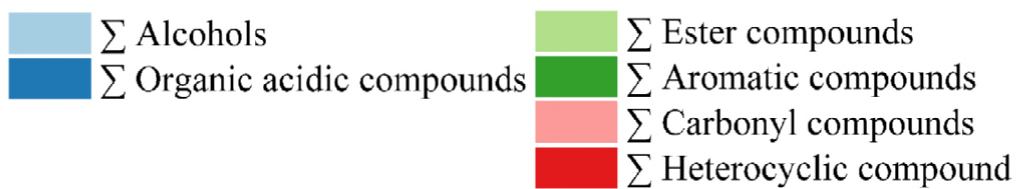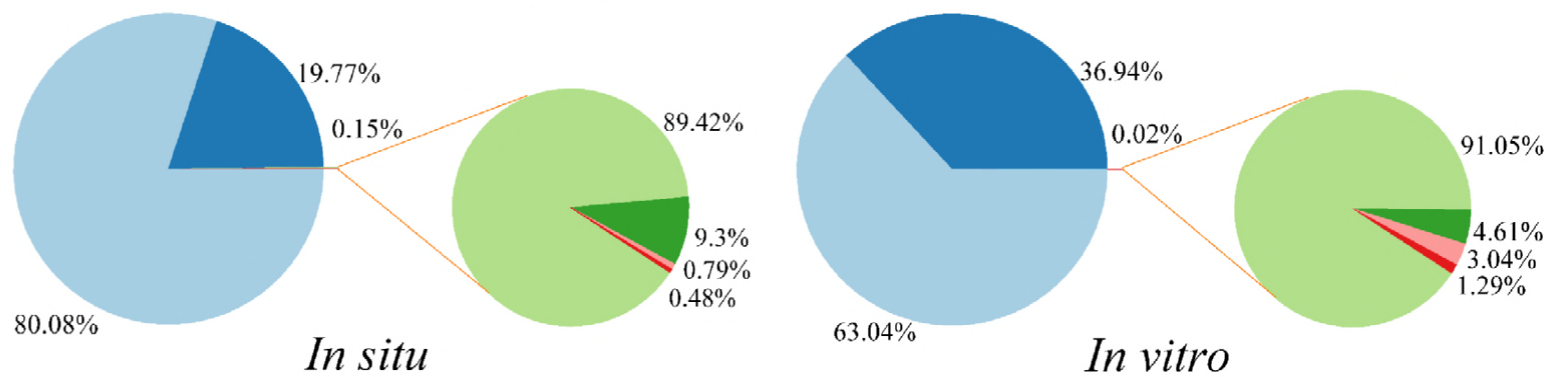

Source: https://www.biorxiv.org/content/10.1101/510610v1.full.pdf
